# Supplementary material for: Emerging Trends in Neurology: A Multi-Dimensional Scientometric Analysis from 2016-2025
Source: Research Square preprint supplement (doi:10.21203/rs.3.rs-8392403/v1), 2025-12-19
Supplement: Supplementary file 1 [file 408248f73c8ae0bdf3e75a5e.xlsx]

## Sheet: year
S.No	Year	Publications	%	Cum	%	Citations	%	H-index	CPP	RCI
1	2016	329	9.21827	426	2.10745	2	0.181324	1	0.00607903	0.01967
2	2017	325	9.10619	751	3.71525	13	1.1786	3	0.04	0.129429
3	2018	339	9.49846	1090	5.3923	136	12.33	4	0.40118	1.29811
4	2019	347	9.72261	1437	7.10893	70	6.34633	5	0.201729	0.652739
5	2020	363	10.1709	1800	8.90472	200	18.1324	5	0.550964	1.78277
6	2021	365	10.227	2165	10.7104	77	6.98096	4	0.210959	0.682604
7	2022	382	10.7033	2547	12.6002	80	7.25295	5	0.209424	0.677638
8	2023	408	11.4318	2955	14.6186	301	27.2892	4	0.737745	2.38714
9	2024	422	11.824	3377	16.7062	26	2.35721	3	0.0616114	0.199357
10	2025	289	8.09751	3666	18.1359	198	17.951	5	0.685121	2.21686
	Total	3569	100	20214	100	1103	100

## Sheet: RGR
S.No	Year	Publications	Cumulative	W1	W2	RGR	Dt
1	2016	329	329		5.79606
2	2017	325	654	5.79606	6.48311	0.68705	1.01303
3	2018	339	993	6.48311	6.90073	0.417623	1.66657
4	2019	347	1340	6.90073	7.20042	0.299694	2.32237
5	2020	363	1703	7.20042	7.44015	0.239722	2.90337
6	2021	365	2068	7.44015	7.63434	0.194191	3.58411
7	2022	382	2450	7.63434	7.80384	0.169506	4.10605
8	2023	408	2858	7.80384	7.95788	0.154034	4.51848
9	2024	422	3280	7.95788	8.0956	0.137721	5.05368
10	2025	289	3569	8.0956	8.18004	0.084442	8.24234
	Total	3569	19244

## Sheet: Document
S.No	Document type	No. of articles	%	Cumulative	%
1	Article	1503	42.1126	1503	21.0563
2	Conference Paper	667	18.6887	2170	30.4007
3	Review	529	14.8221	2699	37.8117
4	Book Chapter	228	6.38834	2927	41.0059
5	Editorial	191	5.35164	3118	43.6817
6	Book	157	4.39899	3275	45.8812
7	Erratum	115	3.22219	3390	47.4923
8	Note	88	2.46568	3478	48.7251
9	Letter	44	1.23284	3522	49.3416
10	Short Survey	40	1.12076	3562	49.9019
11	Data Paper	5	0.140095	3567	49.972
12	Retracted	2	0.0560381	3569	50
	Total	3569	100	7138	100

## Sheet: subject
S.No	Subject area	No. of articles	%
1	Medicine	1442	16.5159
2	Neuroscience	1029	11.7856
3	Computer Science	894	10.2394
4	Engineering	686	7.85706
5	Biochemistry, Genetics and Molecular Biology	400	4.58138
6	Mathematics	314	3.59638
7	Physics and Astronomy	284	3.25278
8	Psychology	208	2.38232
9	Social Sciences	205	2.34796
10	Materials Science	201	2.30214
	Total	5663	64.8608

## Sheet: author
S.No	Authors	Country	Publications	%	Citations	%	H-Index	CPP	RCI
1	Edison, P.	United States	24	22.2222	390	22.8337	9	16.25	1.02752
2	Bassett, D.S.	United Kingdom	13	12.037	390	22.8337	9	30	1.89696
3	Illes, J.	China	10	9.25926	427	25	6	42.7	2.7
4	Sandrone, S.	Germany	10	9.25926	131	7.66979	5	13.1	0.828337
5	Stahnisch, F.W.	Italy	10	9.25926	26	1.52225	3	2.6	0.164403
6	Diwakar, S.	Canada	9	8.33333	57	3.33724	5	6.33333	0.400468
7	Fangerau, H.	India	8	7.40741	157	9.19204	6	19.625	1.24093
8	Ganapathy, K.	Undefined	8	7.40741	57	3.33724	5	7.125	0.450527
9	Karenberg, A.	France	8	7.40741	16	0.936768	3	2	0.126464
10	Majumdar, A.	Australia	8	7.40741	57	3.33724	5	7.125	0.450527
	Total		108	100	1708	100

## Sheet: keyword
S.No	Keyword	No. of articles	%
1	Neurology	2792	28.0942
2	Human	1614	16.2407
3	Neuroscience	1453	14.6206
4	Humans	1063	10.6963
5	Brain	842	8.47253
6	Article	770	7.74804
7	Neurosciences	368	3.70296
8	Priority Journal	353	3.55202
9	Male	342	3.44134
10	Review	341	3.43127
	Total	9938	100

## Sheet: FUND
S.No	Funding agency	No. of articles	%
1	National Institutes of Health	253	24.0038
2	National Science Foundation	166	15.7495
3	National Natural Science Foundation of China	165	15.6546
4	Horizon 2020 Framework Programme	104	9.86717
5	National Institute of Neurological Disorders and Stroke	100	9.48767
6	National Institute of Mental Health	69	6.54649
7	European Commission	52	4.93359
8	European Research Council	52	4.93359
9	Deutsche Forschungsgemeinschaft	47	4.4592
10	National Institute on Aging	46	4.36433
	total	1054	100

## Sheet: country
S.No	Country	No.of articles	%	Citations	%	H- I ndex	CPP	RCI
1	United States	1273	36.6859	27	12.4424	2	0.0212097	0.33916
2	United Kingdom	436	12.5648	3	1.38249	1	0.00688073	0.110028
3	China	407	11.7291	5	2.30415	2	0.012285	0.196447
4	Germany	249	7.17579	39	17.9724	2	0.156627	2.50458
5	Italy	220	6.34006	6	2.76498	2	0.0272727	0.436112
6	Canada	215	6.19597	37	17.0507	2	0.172093	2.7519
7	India	195	5.6196	4	1.84332	1	0.0205128	0.328016
8	Undefined	180	5.18732	44	20.2765	3	0.244444	3.90886
9	France	154	4.43804	24	11.0599	3	0.155844	2.49207
10	Australia	141	4.0634	28	12.9032	2	0.198582	3.17547
	Total	3470	100	217	100

## Sheet: TS
Sl. No	Year	Count (Y)	X	X2	XY
1	2016	329	-5	25	-1645
2	2017	325	-4	16	-1300
3	2018	339	-3	9	-1017
4	2019	347	-2	4	-694
5	2020	363	-1	1	-363
6	2021	365	1	1	365
7	2022	382	2	4	764
8	2023	408	3	9	1224
9	2024	422	4	16	1688
10	2025	289	5	25	1445
	Total	3569		110	467

## Sheet: journals
S.No	Journal	No. of articles	%	Citations	%	H- Index	CPP	RCI
1	Lecture Notes in Computer Science Including Subseries Lecture Notes in Artificial Intelligence and Lecture Notes in Bioinformatics	91	21.6667	11	0.580781	2	0.120879	0.0268053
2	Nature	57	13.5714	275	14.5195	7	4.82456	1.06986
3	Heliyon	42	10	74	3.90707	4	1.7619	0.390707
4	Neurology	39	9.28571	23	1.21436	3	0.589744	0.130777
5	Frontiers in Computational Neuroscience	37	8.80952	40	2.11193	4	1.08108	0.239733
6	Nature Communications	37	8.80952	49	2.58712	3	1.32432	0.293673
7	Journal of Neural Engineering	32	7.61905	119	6.283	5	3.71875	0.824644
8	Philosophical Transactions of the Royal Society B Biological Sciences	31	7.38095	247	13.0412	7	7.96774	1.76687
9	Lancet Neurology	27	6.42857	393	20.7497	2	14.5556	3.22774
10	Trends in Cognitive Sciences	27	6.42857	663	35.0053	9	24.5556	5.44527
	Total	420	100	1894	100

[truncated: 2 more sheets: Institi, Sheet2]
